# Supplementary figures and images for: Free fatty acids induce the demethylation of the fructose 1,6-biphosphatase 2 gene promoter and potentiate its expression in hepatocytes
Source: Royal Society of Chemistry journal article supplement (doi:10.1039/d0fo02654a), 2021-01-01

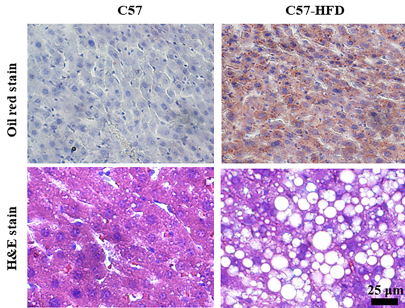

Supplement: d0fo02654a2.pdf [file d0fo02654a2.pdf]

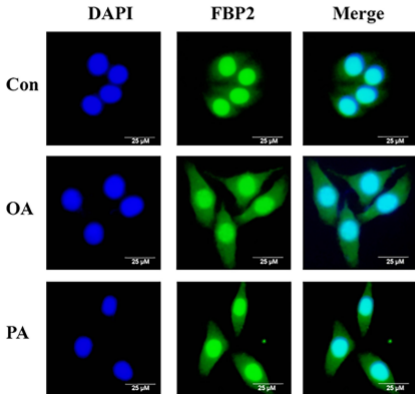

Supplement: d0fo02654a3.pdf [file d0fo02654a3.pdf]

A

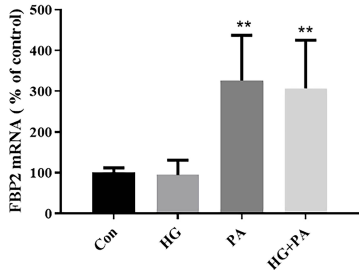

B

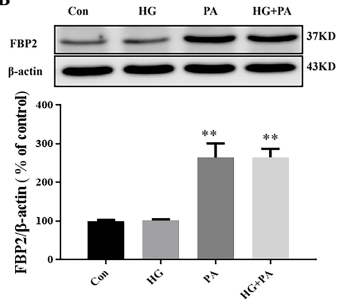

Supplement: d0fo02654a4.pdf [file d0fo02654a4.pdf]
